# Supplementary material for: Clonal architecture predicts clinical outcomes and drug sensitivity in acute myeloid leukemia
Source: PubMed Central journal article supplement (PMC8669028; doi:10.1038/s41467-021-27472-5), 2021-12-13

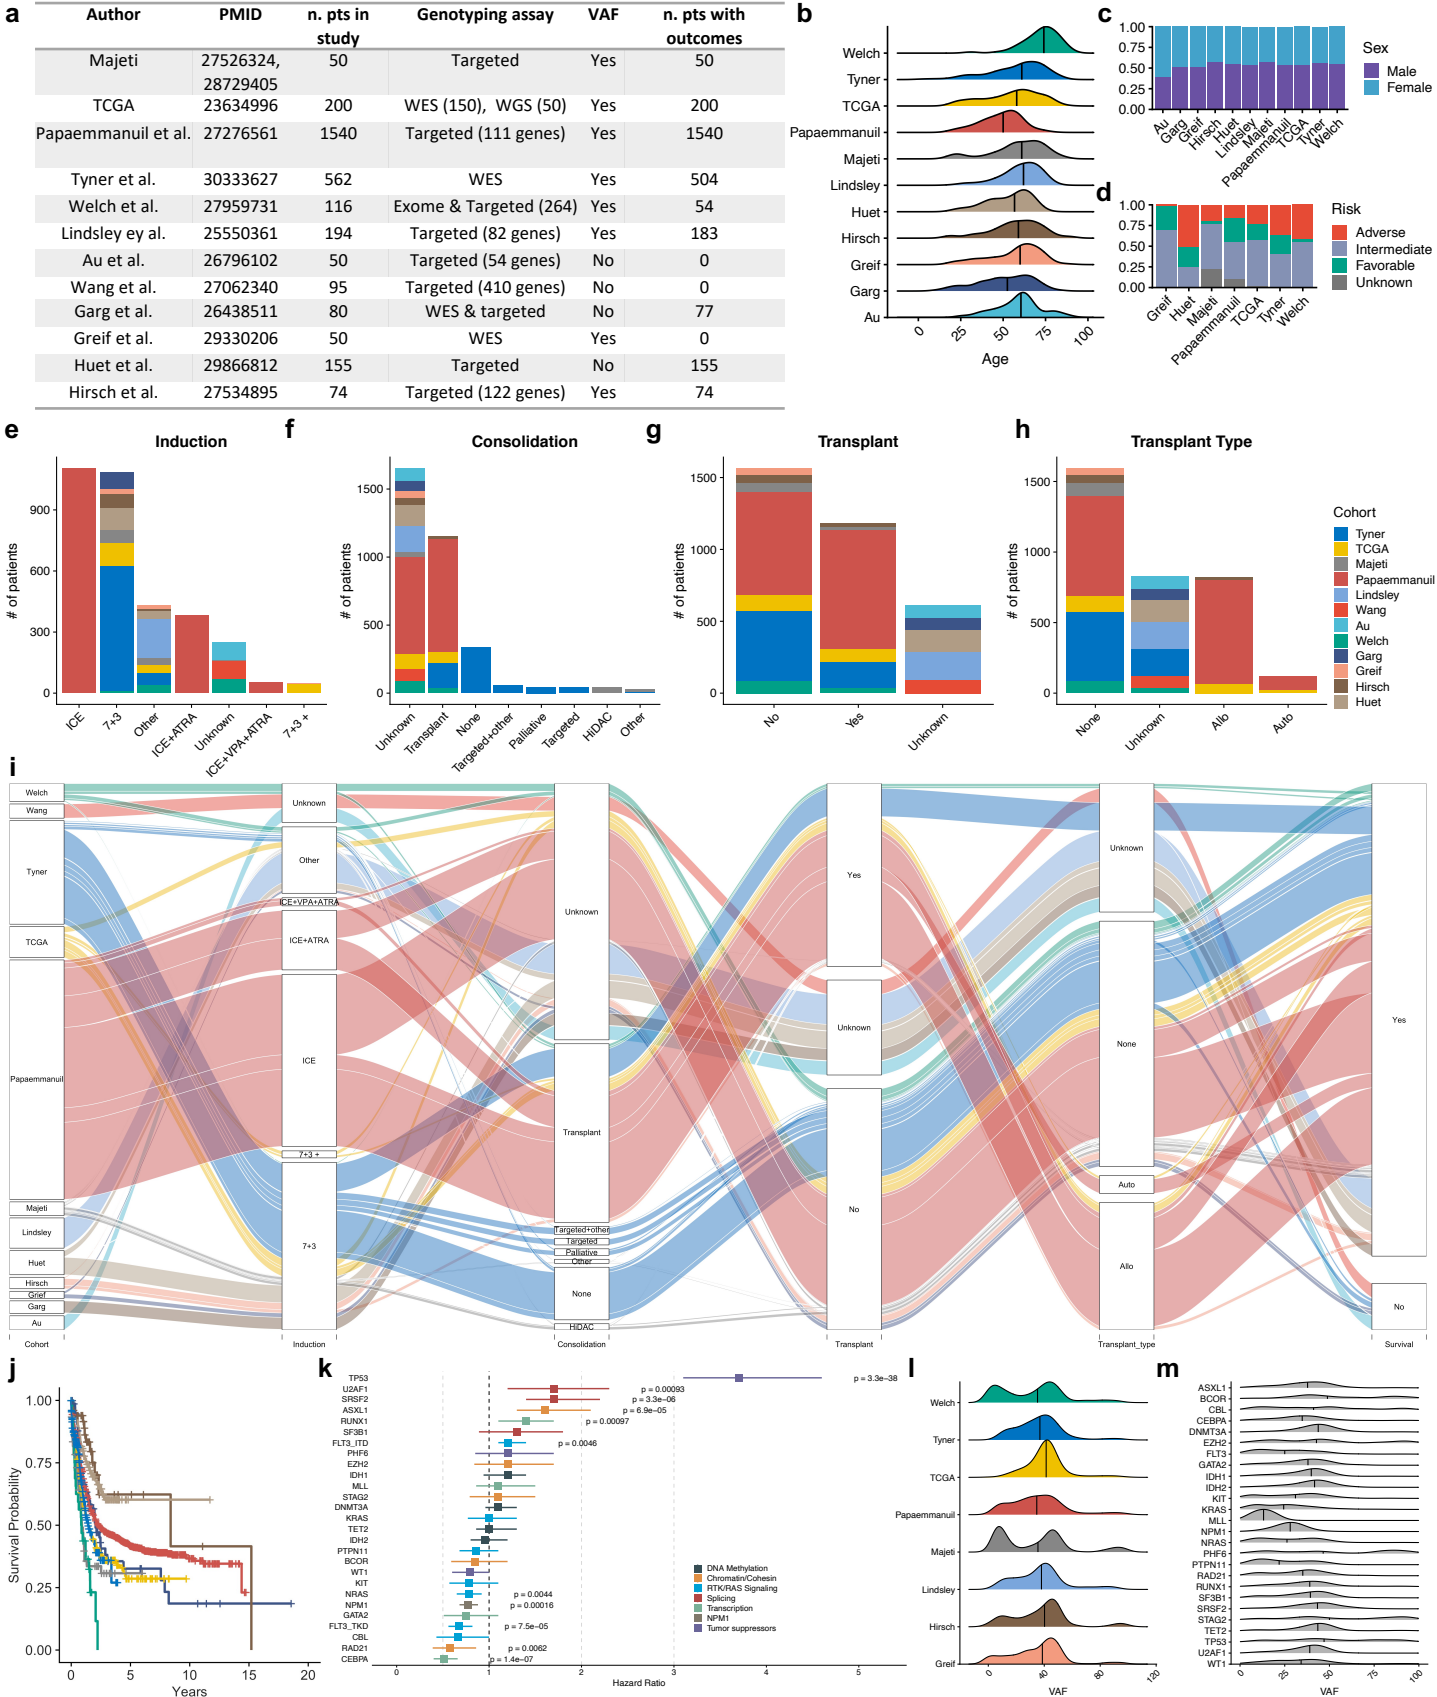

**Supplementary Fig. 1: Cohort characteristics.** **a** Summary table of data available per cohort. **b** Density plot for age distribution in cohorts reporting age. **c** Percentage of patients in each cohort based on reported sex. **d** Distribution of ELN 2017 risk as a normalized proportion per cohort where risk was reported. **e-h** Distribution of induction (e), consolidation (f), transplant status (g), and transplant type (h) reported in each study. **i** Alluvial plot depicting the flow of available treatment information for the studies included in our cohort. Ribbons are colored based on study and the width of each ribbon is scaled based on the number of patients with a subset of shared features. Because of the extremely heterogeneous treatment histories, patients were grouped into broad treatment bins based on manual curation. **j** Overall survival per cohort for the de novo subset of patients in our study based on Cox proportional-hazards modeling. **k** Forest plot depicting univariate Cox proportional-hazards regression results for the most frequent mutations in the de novo cohort ( $n = 1,857$  patients). Points represent the hazard ratio between mutated and wild-type patients. Error bars represent the 95% confidence intervals of the hazard ratios. **l** Density plot for all reported VAFs per study. **m** Distribution of VAFs for the 21 most common mutations in AML.

n. mut ● 25 ● 50 ● 100 ● 250 ●

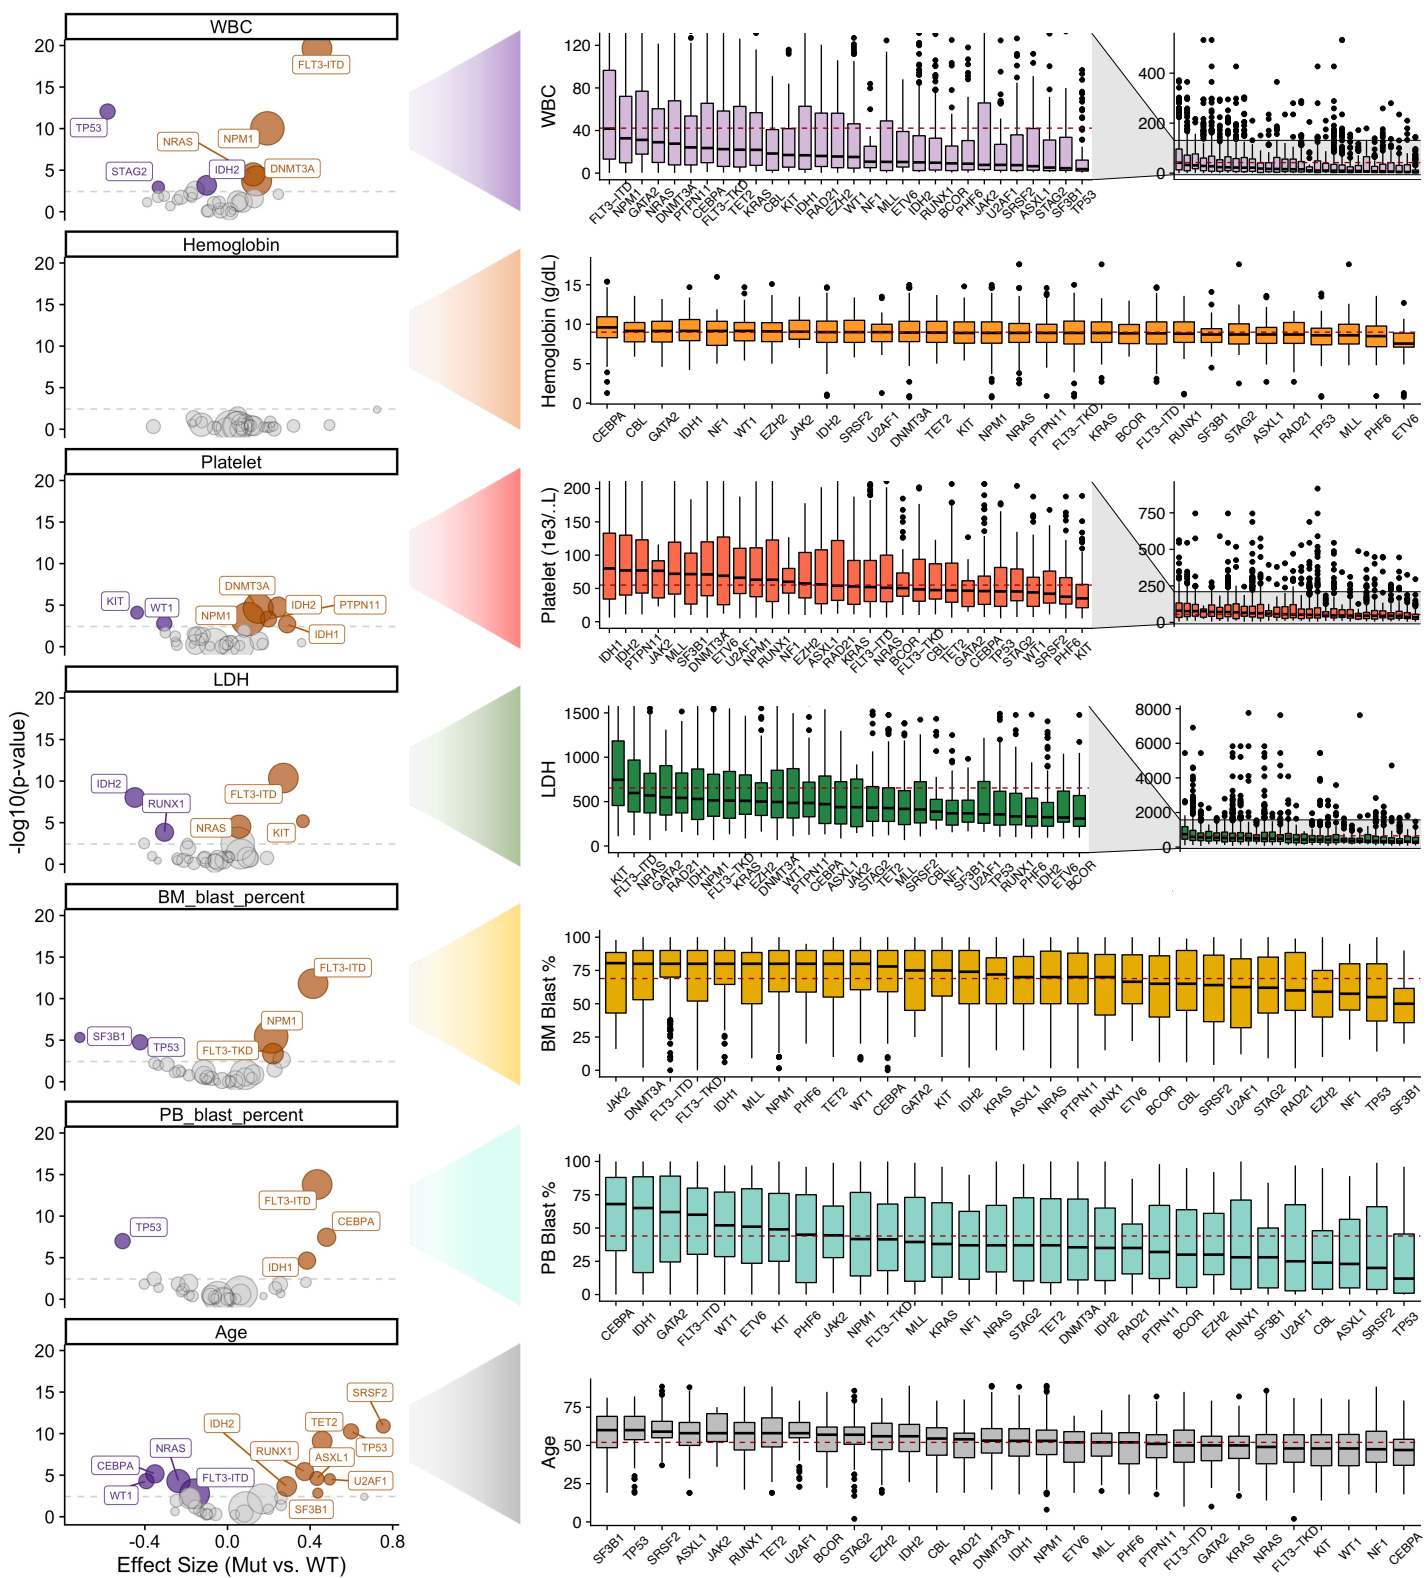

**Supplementary Fig. 2: Association between individual genotypes and clinical features of AML.** Statistical correlation (left) and distribution (right) between clinical features and individual genotypes for the de novo patients in our cohort. Orange points (left panels) indicate statistically significant (Bonferroni FDR < 0.05) positive effect sizes while purple points (left panels) indicate negative effect sizes. Effect sizes (Cohen's *d*) were calculated between mutated and wild-type patients. P-values were calculated using a two-sided Wilcoxon rank sum test. Dashed red lines (right panels) indicate the mean value for that feature across all mutations. For each distribution, the boxplot represents the boundaries for the first and third quartiles with a line at each median; whiskers delimit the highest data point below the third quartile +1.5x the interquartile distance and the lowest data point above the first quartile -1.5x the interquartile distance.

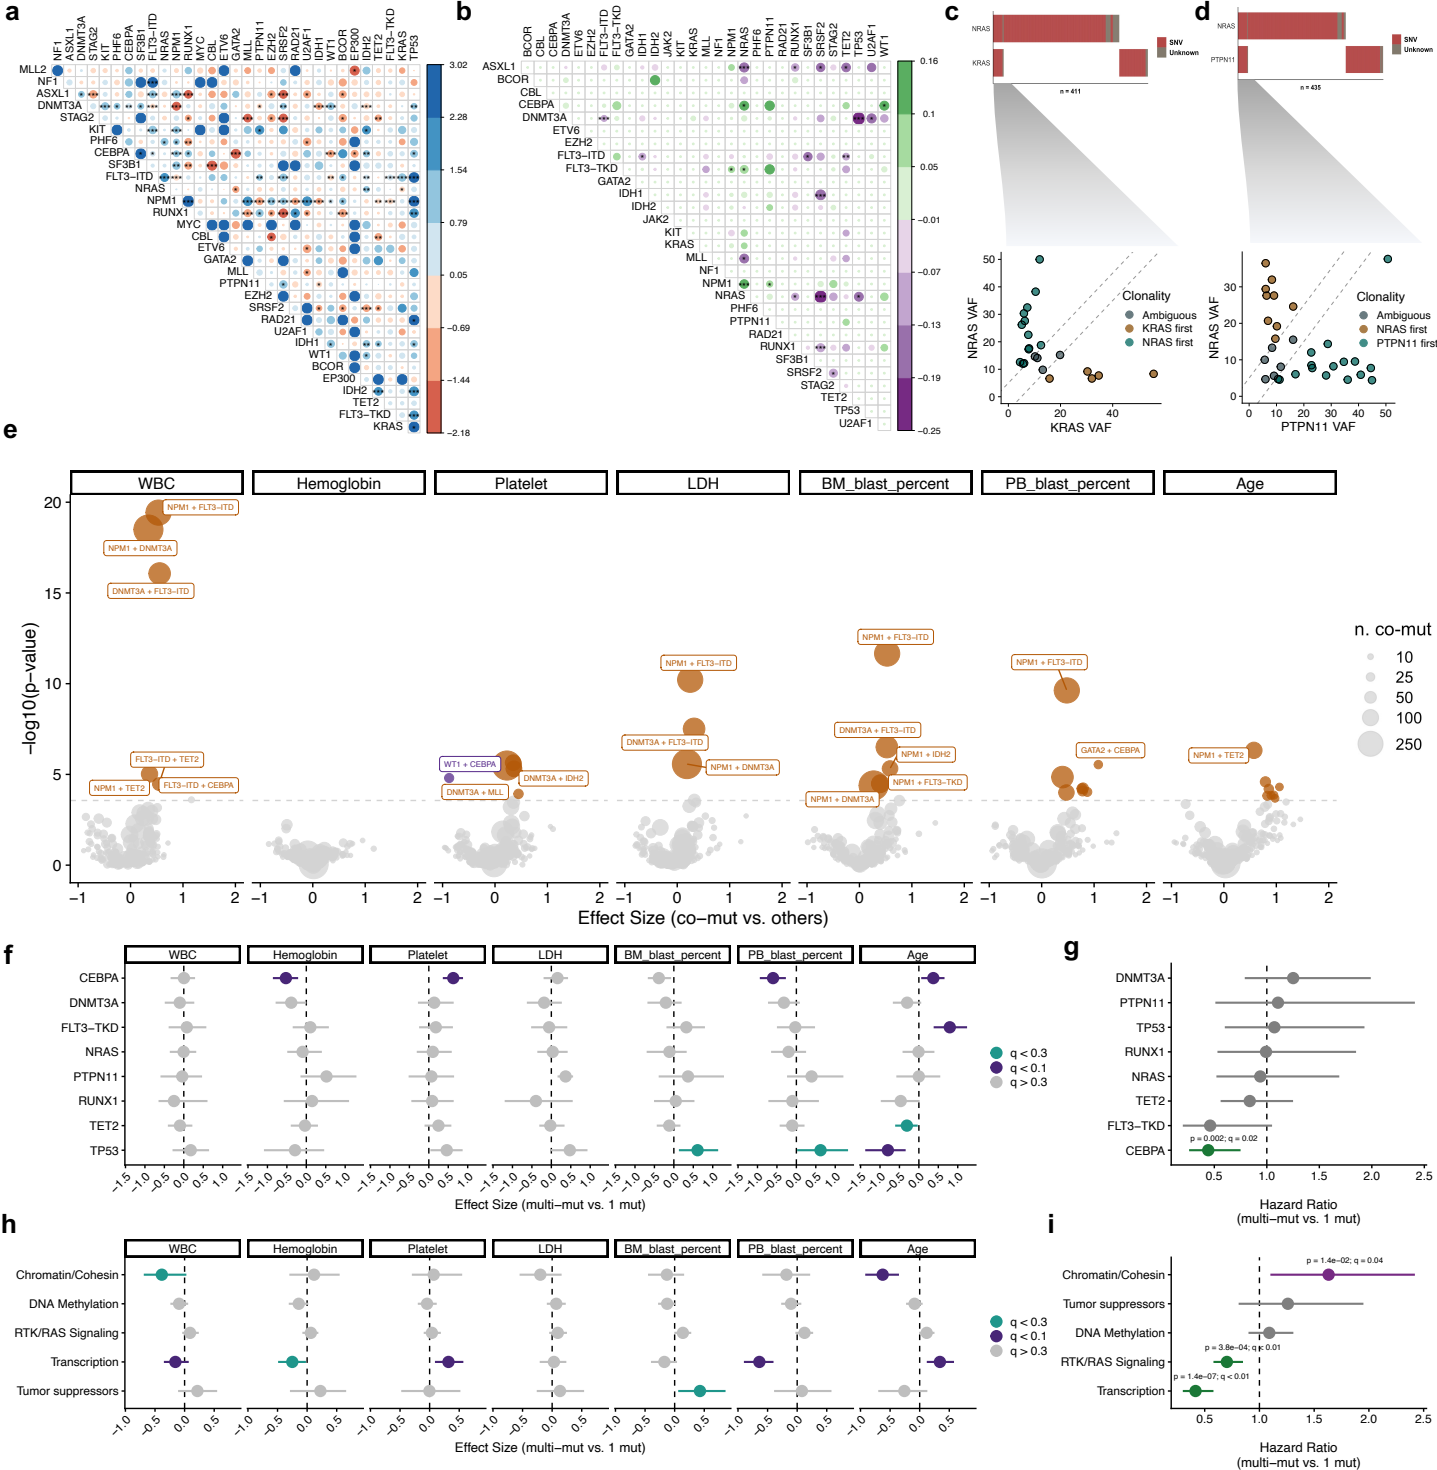

**Supplementary Fig. 3: Mutation co-occurrence associates with survival outcomes and clinical features of disease presentation.** **a** Co-occurrence and mutual exclusivity of the most frequent mutations present in de novo AML was performed using a two-sided Fisher's Exact test. Point size and color are based on the magnitude and directionality of the odds ratio based on co-occurrence (red) or mutual exclusivity (blue). Asterisks representing the FDR-corrected significance. **b** Correlation plot depicting the log-transformed hazard ratio compared to wild-type patients, with green depicting better prognosis ( $HR \leq 1$ ) and purple representing worse prognosis ( $HR \geq 1$ ). **c-d** Representative examples of how binary pairwise mutation analysis can miss informative patterns of clonality. For patients with co-occurring *NRAS* and *KRAS* mutations (**c**) or *NRAS* and *PTPN11* mutations (**d**), VAF scatterplots reveals an interesting pattern of inverse clonality, indicating the presence of both major and minor clones driven by different alterations in RAS/MAPK signaling within the same patient. **e** Correlation between pairwise genotypes and clinical features of disease presentation. All genotypes with  $q < 0.1$  are colored and annotated according to effect size (purple = negative effect size; orange = positive effect size). Effect sizes (Cohen's  $d$ ) were calculated between co-mutated and all other patients. P-values were calculated using a two-sided Wilcoxon rank sum test. **f** Effect size of clinical features between patients with multiple mutations in the same gene compared to patients with a single mutation in that gene ( $n = 1,425$  patients). Points represent the effect size for each clinical variable between multi-mutated and single mutated patients. Significant associations are colored based on the level of significance (Bonferroni FDR  $< 0.3$ ); bars represent the 95% confidence intervals of the effect sizes. **g** Forrest plot depicting the Cox proportional-hazards regression results for overall survival between multi-mutated and single mutated patients ( $n = 1,047$  patients). Points represent the hazard ratio for each mutation between multi-mutated and single mutated patients. Bars represent the 95% confidence intervals of the hazard ratios; green points represent better prognosis ( $HR \leq 1$ ) and purple representing worse prognosis ( $HR \geq 1$ ). **h** Effect size of clinical features between patients with multiple mutations in the same functional category compared to patients with a single mutation in that category ( $n = 2,036$  patients). Points represent the effect size for each clinical variable between patients with multiple mutations in a functional category compared to patients with only a single mutation in that functional category. Significant associations are colored based on the level of significance (Bonferroni FDR  $< 0.3$ ); bars represent the 95% confidence intervals of the effect sizes. **i** Forrest plot depicting the Cox proportional-hazards regression results for overall survival between multi-mutated and single mutated patients based on mutation category ( $n = 1,864$  patients). Points represent the hazard ratio between patients with multiple mutations in a functional category compared to patients with only one mutation in that category. Bars represent the 95% confidence intervals of the hazard ratios; green points represent better prognosis ( $HR \leq 1$ ) and purple representing worse prognosis ( $HR \geq 1$ ). \* $q < 0.1$ ; \*\* $q < 0.01$ ; \*\*\* $q < 0.001$

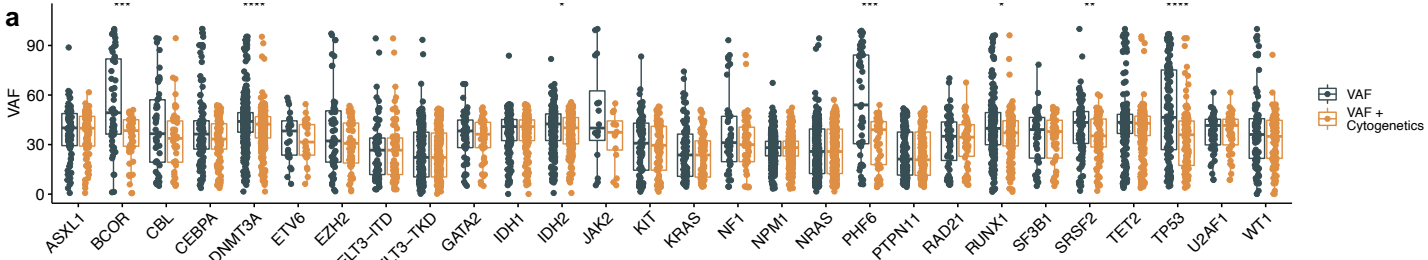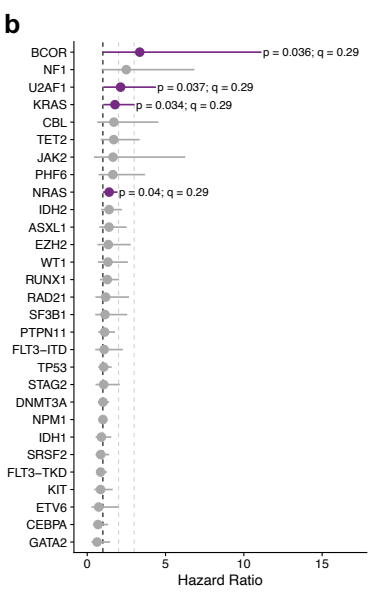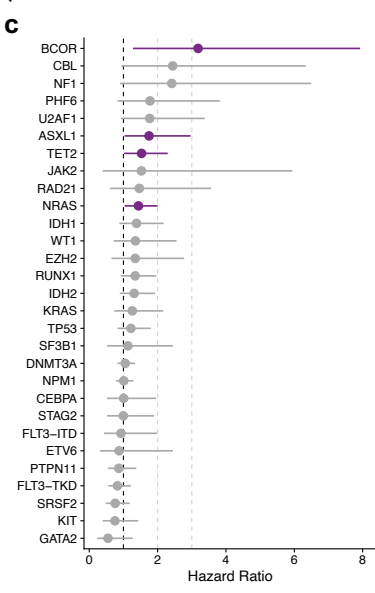

**d**

| Gene     | VAf threshold | HR         | Lower CI | Upper CI | p-value    | q-value    |
|----------|---------------|------------|----------|----------|------------|------------|
| ASXL1    | 24.1          | 2.44593767 | 1.13     | 5.3      | 0.01980609 | 0.07179707 |
| BCOR     | 37.74         | 3.94586951 | 1.69     | 9.19     | 0.00065757 | 0.01838588 |
| CBL      | 34.75         | 2.44041962 | 0.94     | 6.33     | 0.05847409 | 0.12782773 |
| CEBPA    | 18            | 0.4889796  | 0.22     | 1.08     | 0.07052564 | 0.12782773 |
| DNMT3A   | 32.63         | 1.31728214 | 0.97     | 1.79     | 0.0762812  | 0.13012676 |
| ETV6     | 23.47         | 2.29998632 | 0.52     | 10.22    | 0.26008085 | 0.29009018 |
| EZH2     | 38.87         | 1.71341368 | 0.84     | 3.51     | 0.1360809  | 0.18758348 |
| FLT3-ITD | 17.65         | 0.65695363 | 0.3      | 1.44     | 0.29202343 | 0.31365479 |
| FLT3-TKD | 46.15         | 0.48392026 | 0.22     | 1.04     | 0.05835546 | 0.12782773 |
| GATA2    | 19.16         | 0.22504085 | 0.07     | 0.68     | 0.00391878 | 0.03788157 |
| IDH1     | 44.5          | 1.4035701  | 0.91     | 2.17     | 0.12675856 | 0.18544376 |
| IDH2     | 33.5          | 1.47819776 | 0.99     | 2.22     | 0.05752072 | 0.12782773 |
| JAK2     | 9.5           | 2.51008586 | 0.31     | 20.26    | 0.37195563 | 0.37195563 |
| KIT      | 19.28         | 0.59423968 | 0.3      | 1.17     | 0.12789225 | 0.18544376 |
| KRAS     | 29.03         | 1.69223435 | 0.98     | 2.94     | 0.05829089 | 0.12782773 |
| NF1      | 34.38         | 3.67437285 | 1.36     | 9.94     | 0.00632152 | 0.045831   |
| NPM1     | 34.75         | 1.26100524 | 0.88     | 1.81     | 0.20923453 | 0.24271205 |
| NRAS     | 39.4          | 1.56151452 | 1.11     | 2.2      | 0.01056648 | 0.05884314 |
| PHF6     | 22.92         | 4.99812719 | 1.71     | 14.59    | 0.00126799 | 0.01838588 |
| PTPN11   | 39.61         | 1.85318017 | 1.12     | 3.06     | 0.0143665  | 0.05951834 |
| RAD21    | 8.92          | 2.52870581 | 0.34     | 18.82    | 0.34790026 | 0.36032527 |
| RUNX1    | 39.05         | 1.38724005 | 0.95     | 2.02     | 0.086423   | 0.13923706 |
| SF3B1    | 46.67         | 2.15344405 | 0.93     | 5        | 0.06742429 | 0.12782773 |
| SRSF2    | 35.29         | 0.73352264 | 0.47     | 1.15     | 0.17466937 | 0.21105882 |
| STAG2    | 47.92         | 0.27923541 | 0.07     | 1.16     | 0.06025071 | 0.12782773 |
| TET2     | 38.68         | 1.83164247 | 1.13     | 2.96     | 0.01217444 | 0.05884314 |
| TP53     | 12.5          | 1.48483728 | 0.84     | 2.61     | 0.16704692 | 0.21062437 |
| U2AF1    | 42.36         | 1.81752125 | 0.95     | 3.46     | 0.06575014 | 0.12782773 |
| WT1      | 42.51         | 1.58105905 | 0.85     | 2.93     | 0.14230471 | 0.18758348 |

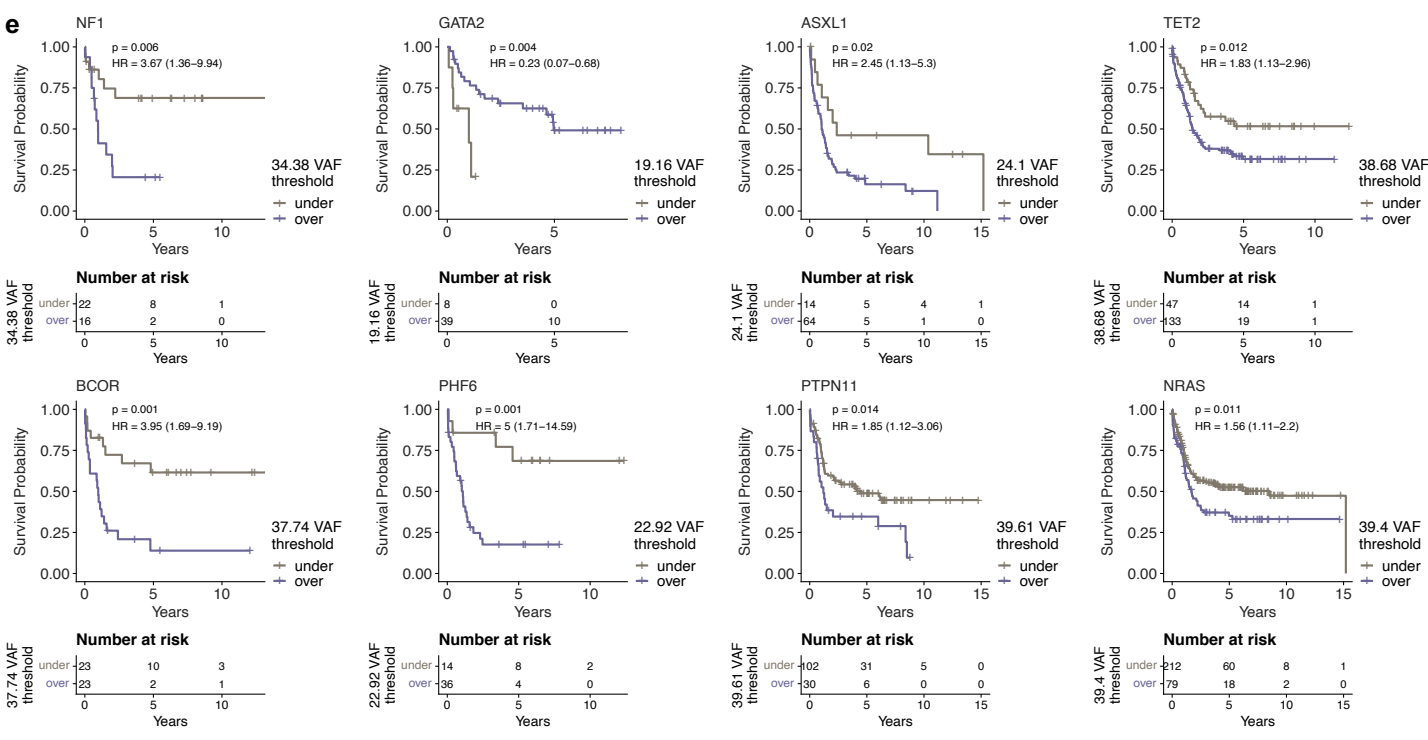

**Supplementary Fig. 4: VAF correction and optimal survival thresholds.** **a** Raw and copy number-corrected VAFs for the most frequent mutations in the de novo cohort ( $n = 1,642$  patients). For each distribution, the boxplot represents the boundaries for the first and third quartiles with a line at each median; whiskers delimit the highest data point below the third quartile  $+1.5x$  the interquartile distance and the lowest data point above the first quartile  $-1.5x$  the interquartile distance. Differences in mean VAF distribution before and after CNA correction was tested using a two-sided Wilcoxon rank-sum test.  $*p \leq 0.05$ ;  $**p \leq 0.01$ ;  $***p \leq 0.001$ ;  $****p \leq 0.0001$ . **b** Forest plot summarizing univariate Cox proportional-hazards regression modeling of recurrent mutations based on static VAF level of 30% in the de novo cohort ( $n = 1,587$  patients). Bars represent the 95% confidence intervals of the hazard ratios. **c** Forest plot summarizing univariate Cox proportional-hazards regression modeling of recurrent mutations based on median VAF thresholds per gene in the de novo cohort ( $n = 1,587$  patients). Bars represent the 95% confidence intervals of the hazard ratios. **d** Summary table of optimal VAF thresholds for prognostic stratification based on maximally selected rank statistics. Hazard ratios and confidence intervals were calculated using standard Cox proportional-hazards regression; q-values were calculated in terms of the false discovery rate using Bonferroni correction. **e** Kaplan-Meier plots for mutations showing significant risk stratification based on dynamic VAF thresholds. Hazard ratios and confidence intervals were calculated using standard Cox proportional-hazards regression; p-values were calculated using a two-sided log-rank test.





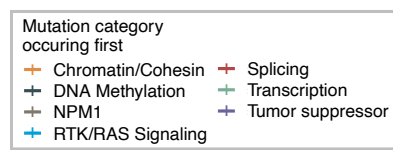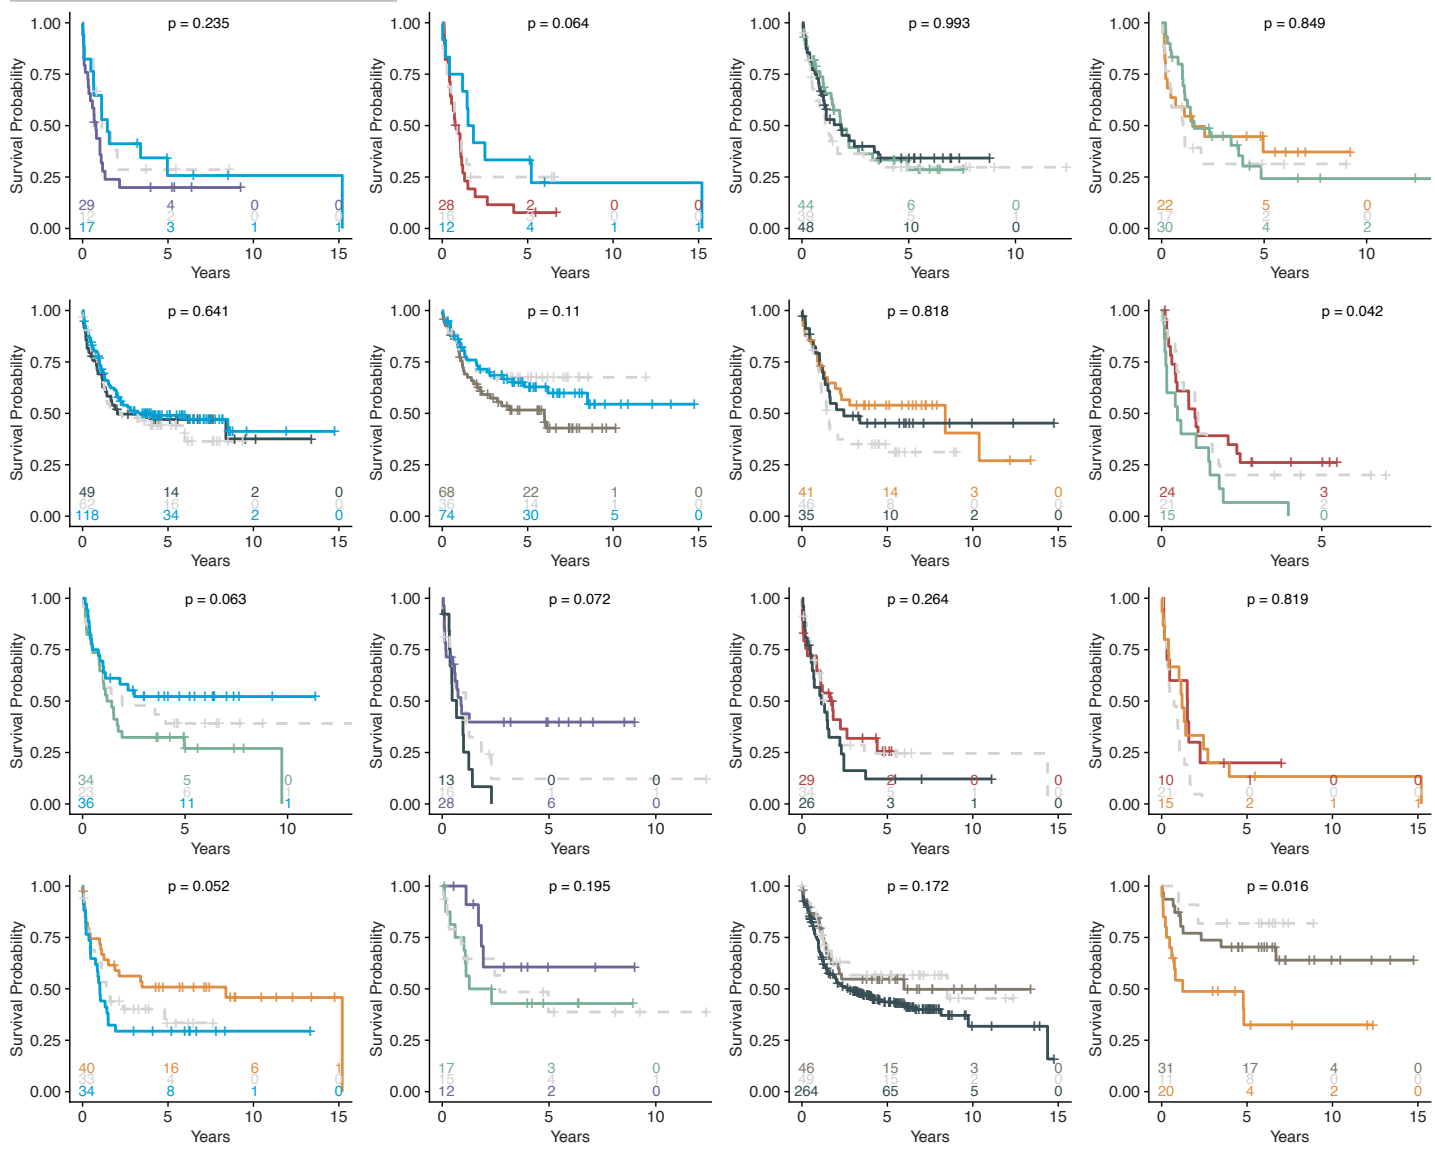

**Supplementary Fig. 6: Correlation between survival and the order of acquisition for different mutation category.** Kaplan-Meier plots for patient survival based on the inferred ordering of functional mutation categories based on univariate Cox proportional-hazards regression analysis. Grey curves represent ambiguous ordering. Reported p-values are calculated between functional categories with assigned ordering.

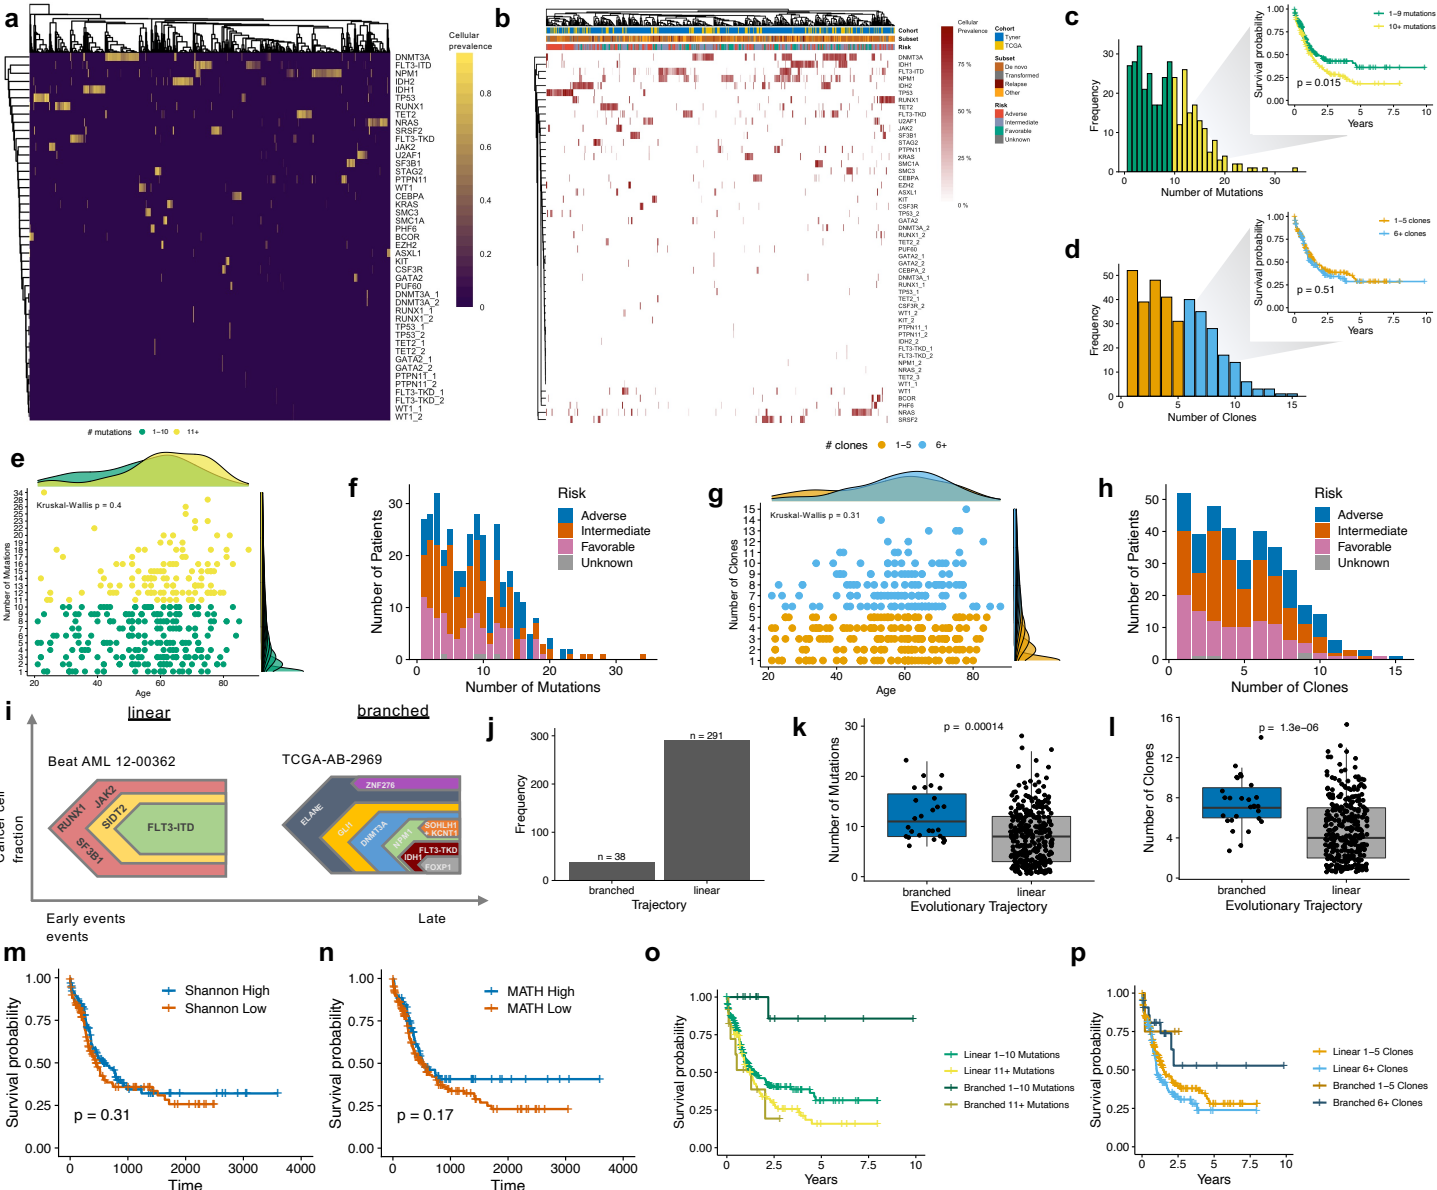

**Supplementary Fig. 7: Features of clonality in de novo AML. a** Heatmap of PyClone results for cellular prevalences of recurrent mutations clustered by unique clonal populations. Each column is a distinct clonal population predicted by PyClone. For clones with multiple mutations in the same gene, mutations are assigned based on their clonal dominance of cancer cell fraction (CCF) (e.g. DNMT3A\_1 CCF > DNMT3A\_2 CCF). **b** Heatmap of PyClone results for cellular prevalences of recurrent mutations clustered by patient samples. **c** Histogram and survival based on median protein-coding mutation burden per patient in de novo samples. p-value for the difference in survival strata was calculated using a two-sided log-rank test. **d** Histogram and survival based on median clonal abundance per patient in de novo samples. P-value for the difference in survival strata was calculated using a two-sided log-rank test. **e** Correlation between age and mutation burden. A two-sided Kruskal-Wallis test was used to calculate the reported p-value. **f** Histogram of mutation burden per patient stratified by ELN risk category. **g** Correlation between age and clonal burden. A two-sided Kruskal-Wallis test was used to calculate the reported p-value. **h** Histogram of clonal burden per patient stratified by ELN risk category. **i** Schematic showing example plots for predicted evolutionary architectures. **j** Bar plot of the number of assigned linear or branched architectures in de novo samples. **k, l** Boxplot showing statistically significant enrichment of higher mutational (**k**) and clonal (**l**) burden in samples with a branched architecture ( $n = 409$  biologically independent samples). For each distribution, the boxplot represents the boundaries for the first and third quartiles with a line at each median; whiskers delimit the highest data point below the third quartile  $+1.5x$  the interquartile distance and the lowest data point above the first quartile  $-1.5x$  the interquartile distance. Reported p-values are calculated using a two-sided Welch t-test. **m-n** Kaplan-Meier plots showing no significant differences in outcomes based on Shannon diversity index (**m**) or MATH score (**n**) per patient; p-values were calculated using a two-sided log-rank test. **o, p** Kaplan-Meier plots showing significant stratification based on mutational and clonal burden within patients with branched architectures.





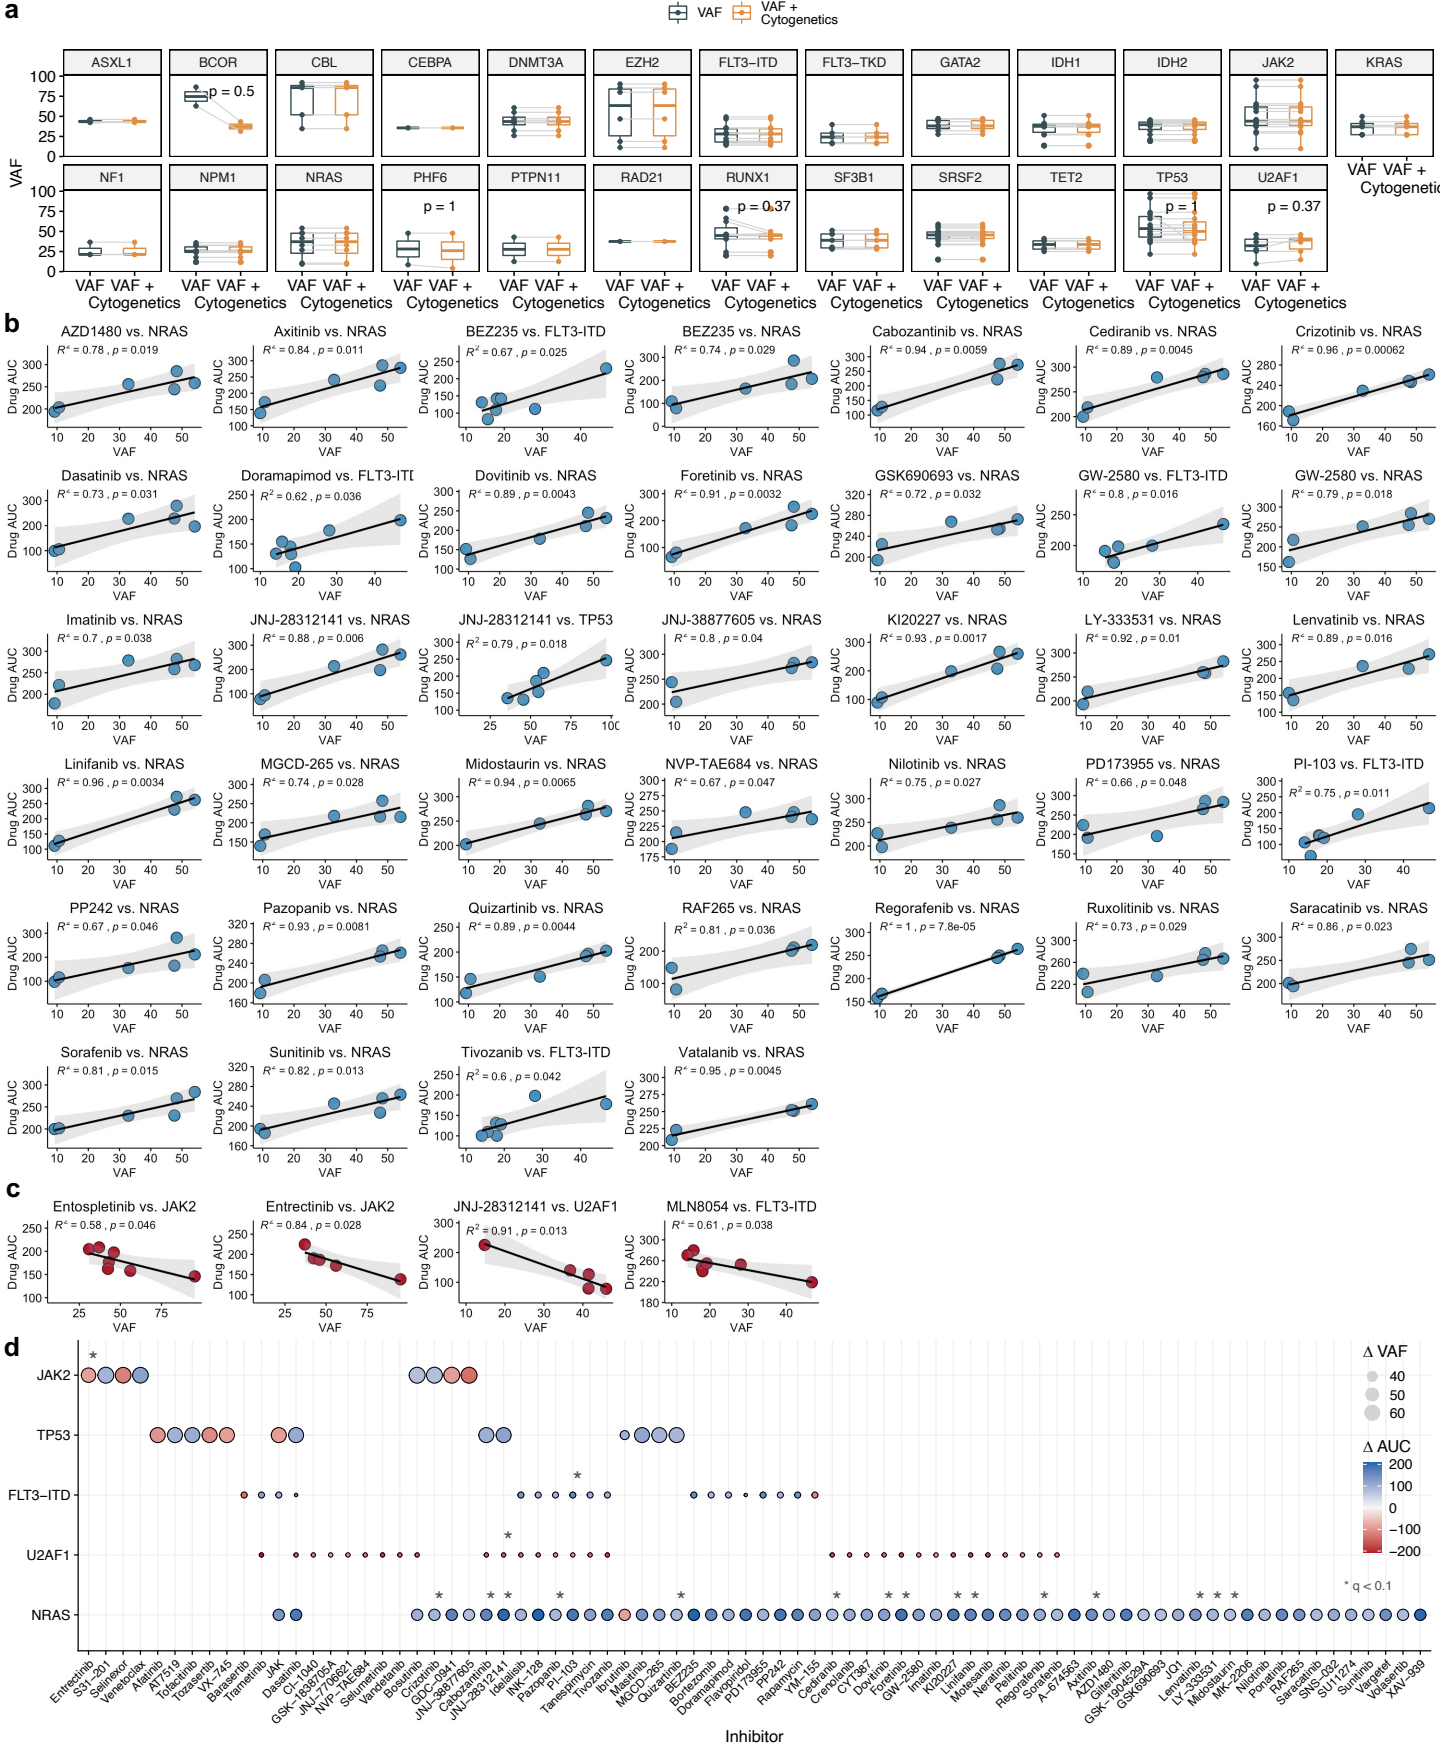

Supplement: 41467_2021_27472_MOESM1_ESM.pdf [file 41467_2021_27472_MOESM1_ESM.pdf]
